# Supplementary material
Source: publisher figshare collection journal article supplement (https://sage.figshare.com/ndownloader/files/12784793)
Supplement: Supplementary file 1 [file 12784793]

**Supplementary Figure 2:** Effect of intervention on physical and psychological quality of life.

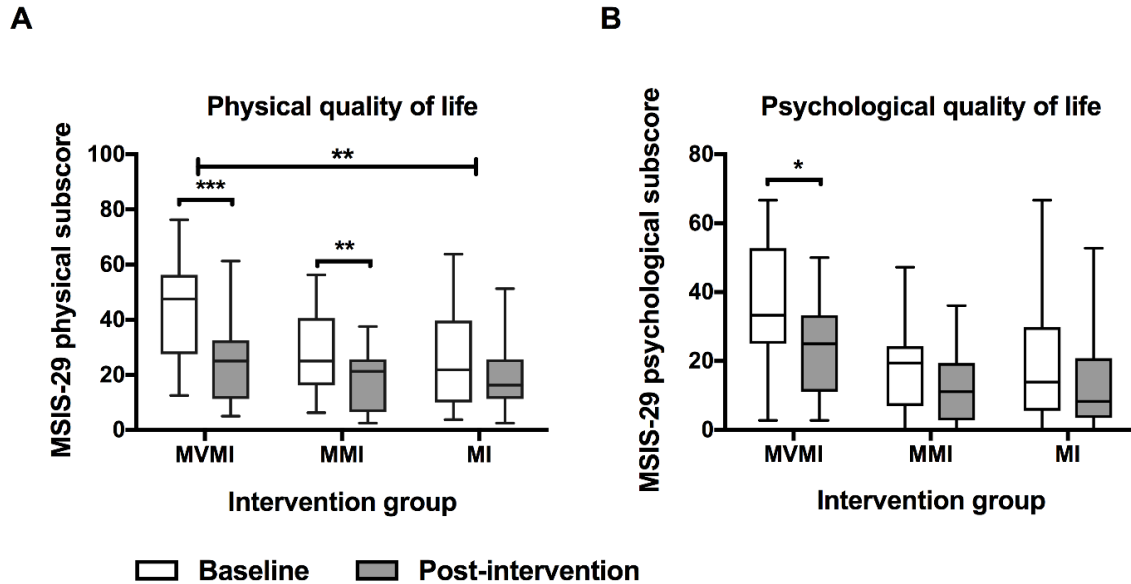

Figure legend: Abbreviations: MVMI: music- and verbally cued MI; MMI: music-cued MI; MI: motor imagery; MSIS-29: Multiple Sclerosis Impact Scale-29. (A) Physical and (B) psychological quality of life; medians are shown by lines in the centre of the box-plots; the 25th-75th percentiles are indicated by the boxes and the range by the whiskers. Square brackets on top of the figures show significant within-group comparisons between baseline and post-intervention; **h-beams** indicate significant group X time interactions; \*p-value <0.05; \*\*p-value <0.01; \*\*\*p-value <0.001.
